# Supplementary material
Source: PubMed Central journal article supplement (PMC4724948)
Supplement: NIHMS65688-supplement-Appendix_4.pdf [file NIHMS65688-supplement-Appendix_4.pdf]

**Appendix 4.** Measurements of the propodi of modern and fossil *Glypturus*.

| taxon            |           | major total length | major fixed finger 1 (tip fixed finger to articulation point dactylus) | Major fixed finger 2 (notch at base fixed finger to tip fixed finger, used for this research) | major max height | minor total length | minor fixed 1 (articulation point) | Major Fixed 2 (notch) | minor max height | Location  | Sex    |
|------------------|-----------|--------------------|------------------------------------------------------------------------|-----------------------------------------------------------------------------------------------|------------------|--------------------|------------------------------------|-----------------------|------------------|-----------|--------|
| <i>Glypturus</i> | NHMW/UF   |                    |                                                                        |                                                                                               |                  |                    |                                    |                       |                  |           |        |
| acanthochirus    | NHMW25261 | 13.2               | 5.6                                                                    | 5.2                                                                                           | 7.4              | 8.3                | 4.3                                | 3.5                   | 4.1              | Aruba     | ?      |
| acanthochirus    | NHMW19624 | 21.3               | 10.5                                                                   | 8.4                                                                                           | 13.8             | 0                  | 0                                  | 0                     | 0                | Belize    | ?      |
| acanthochirus    | NHMW19627 | 25.3               | 12.6                                                                   | 10.3                                                                                          | 16.7             | 0                  | 0                                  | 0                     | 0                | Belize    | ?      |
| acanthochirus    | NHMW15341 | 0                  | 0                                                                      | 0                                                                                             | 0                | 16.4               | 9.4                                | 7.7                   | 9                | Belize    | female |
| acanthochirus    | NHMW6770  | 21.4               | 10.5                                                                   | 8.7                                                                                           | 14.3             | 0                  | 0                                  | 0                     | 0                | Belize    | female |
| acanthochirus    | NHMW15340 | 30.7               | 14.4                                                                   | 12.6                                                                                          | 18.4             | 18.7               | 11.2                               | 8.9                   | 9.3              | Belize    | male   |
| acanthochirus    | NHMW19626 | 25                 | 11.1                                                                   | 10.4                                                                                          | 16.7             | 0                  | 0                                  | 0                     | 0                | Belize    | ?      |
| acanthochirus    | NHMW15338 | 34.5               | 15.4                                                                   | 13.4                                                                                          | 20               | 20.4               | 12.2                               | 9.4                   | 11.1             | Belize    | male   |
| acanthochirus    | NHMW24968 | 23.4               | 10.6                                                                   | 10                                                                                            | 14.5             | 15                 | 8.7                                | 7.2                   | 8.4              | Belize    | ?      |
| acanthochirus    | NHMW6769  | 32.7               | 15.8                                                                   | 12.2                                                                                          | 20               | 19.3               | 11.6                               | 9.2                   | 10.6             | Belize    | ?      |
| acanthochirus    | NHMW6765  | 0                  | 0                                                                      | 0                                                                                             | 0                | 17.5               | 10.5                               | 8.4                   | 9.1              | Belize    | ?      |
| acanthochirus    | NHMW19625 | 15                 | 7.3                                                                    | 6                                                                                             | 9.5              | 0                  | 0                                  | 0                     | 0                | Belize    | ?      |
| acanthochirus    | NHMW24967 | 35                 | 15                                                                     | 14.4                                                                                          | 20.7             | 20.3               | 12.5                               | 9.8                   | 10.6             | Belize    | ?      |
| acanthochirus    | NHMW6768  | 27.4               | 14.7                                                                   | 12.2                                                                                          | 15.7             | 17.5               | 10.6                               | 8.3                   | 9.1              | Belize    | ?      |
| acanthochirus    | NHMW25266 | 11.2               | 5                                                                      | 4.5                                                                                           | 6.8              | 7.5                | 4                                  | 3.5                   | 3                | Venezuela | ?      |
| acanthochirus    | NHMW6766  | 25                 | 11.6                                                                   | 10                                                                                            | 15.7             | 16.4               | 10                                 | 7.4                   | 8.8              | Belize    | ?      |
| acanthochirus    | NHMW15342 | 26.4               | 13.3                                                                   | 11.2                                                                                          | 16.5             | 17.4               | 10.4                               | 8.8                   | 9.1              | Belize    | female |
| acanthochirus    | NHMW6767  | 0                  | 0                                                                      | 0                                                                                             | 0                | 16.3               | 9.2                                | 7.5                   | 8                | Belize    | female |
| acanthochirus    | UF32479   | 22.8               | 8.4                                                                    | 7.7                                                                                           | 14.8             | 13.7               | 7.4                                | 6.1                   | 7.1              | -         | -      |
| acanthochirus    | UF32113   | 15.4               | 6.8                                                                    | 6.2                                                                                           | 10               | 10.2               | 5.6                                | 4.9                   | 5                | -         | -      |
| acanthochirus    | UF32483   | 18.3               | 9                                                                      | 7.5                                                                                           | 11.5             | 11.2               | 6.4                                | 5.6                   | 6.1              | -         | -      |
| acanthochirus    | UF32050   | 6.3                | 2.86                                                                   | 2.64                                                                                          | 3.5              | 4.8                | 2.34                               | 2.09                  | 2.09             | -         | -      |
| acanthochirus    | UF32131   | 7.1                | 3.3                                                                    | 2.96                                                                                          | 4.1              | 5.3                | 2.65                               | 2.39                  | 2.33             | -         | -      |
| armatus          | NHMW21941 | 19.3               | 10                                                                     | 8.1                                                                                           | 10.5             | 14                 | 8.3                                | 6.7                   | 5.1              | ?         | female |
| armatus          | NHMW23822 | 16.2               | 8                                                                      | 7.4                                                                                           | 9.2              | 11.5               | 6.2                                | 5.5                   | 4.2              | ?         | male   |
| armatus          | UF29708   | 14.7               | 6.3                                                                    | 5.9                                                                                           | 8.8              | 9.2                | 5                                  | 4.5                   | 3.6              | -         | -      |

|         |           |      |      |      |      |      |      |      |      |       |        |
|---------|-----------|------|------|------|------|------|------|------|------|-------|--------|
| armatus | UF15484   | 17.7 | 7.3  | 6.4  | 11.2 | 11.2 | 5.8  | 5.07 | 4.72 | -     | -      |
| laurae  | NHMW24923 | 0    | 0    | 0    | 0    | 18.9 | 11.3 | 9.4  | 8.8  | Aqaba | ?      |
| laurae  | NHMW21939 | 0    | 0    | 0    | 0    | 16.5 | 9.1  | 7.6  | 7.3  | Aqaba | ?      |
| laurae  | NHMW6973  | 25   | 13.1 | 10.3 | 11.3 | 16.6 | 10   | 8    | 8.1  | Aqaba | female |

| <b>taxon <i>Glypturus</i></b> | <b>UF</b>          | <b>Propodus total length</b> | <b>Propodus fixed finger 1 (tip fixed finger to articulation point dactylus)</b> | <b>Propodus fixed finger 2 (notch at base fixed finger to tip fixed finger, used for this research)</b> | <b>Propodus max height</b> |
|-------------------------------|--------------------|------------------------------|----------------------------------------------------------------------------------|---------------------------------------------------------------------------------------------------------|----------------------------|
| sikesi, Florida               | DSC09335 UF 235159 | 23.6                         | 9.1                                                                              | 8.3                                                                                                     | 12.6                       |
| sikesi, Florida               | DSC09337 UF 235164 | 22.2                         |                                                                                  | 7.2                                                                                                     | 12.6                       |
| sikesi, Florida               | DSC09345 UF 235156 | 16.9                         | 7.5                                                                              | 6.4                                                                                                     | 9.1                        |
| sikesi, Florida               | DSC09354 UF 235154 | 26.9                         | 10.9                                                                             | 10.1                                                                                                    | 13.8                       |
| sikesi, Florida               | DSC09356 UF 235152 | 24.9                         | 10.3                                                                             | 9                                                                                                       | 13.4                       |
| sikesi, Florida               | DSC09358 UF 235153 | 15.7                         | 6.5                                                                              | 6                                                                                                       | 9.8                        |
| sikesi, Florida               | DSC09377 UF 235357 | 18.6                         |                                                                                  | 7.1                                                                                                     | 10.6                       |
| sikesi, Florida               | DSC09381 UF 235359 | 18.9                         |                                                                                  | 6.7                                                                                                     | 10.9                       |
| sikesi, Florida               | DSC09385 UF 235358 | 18.3                         |                                                                                  | 6.2                                                                                                     | 10.8                       |
| sikesi, Florida               | DSC09406 UF 235412 | 25.7                         | 9.6                                                                              | 8.5                                                                                                     | 13.9                       |
| sikesi, Florida               | DSC09417 UF 235425 | 20.1                         |                                                                                  | 7                                                                                                       | 11.5                       |
| sikesi, Florida               | DSC09443 UF 235423 | 16.1                         | 7                                                                                | 5.9                                                                                                     | 9.6                        |
| sikesi, Florida               | DSC09449 UF 235401 | 10.5                         | 4.3                                                                              | 3.7                                                                                                     | 6.3                        |
| sikesi, Florida               | DSC09457 UF 232630 | 21.6                         | 8.3                                                                              | 7.4                                                                                                     | 11.4                       |
| sikesi, Florida               | DSC09467 UF 232662 | 13                           |                                                                                  | 5.2                                                                                                     | 7                          |
| sikesi, Florida               | DSC09447 UF 235399 | 14.8                         | 6.1                                                                              | 5                                                                                                       | 8.3                        |

|                 |                    |      |     |     |     |
|-----------------|--------------------|------|-----|-----|-----|
| sikesi, Florida | DSC09493 UF 251654 | 13.1 | 5.8 | 5   | 8.1 |
| sikesi, Florida | DSC09389 UF 235367 | 15.5 |     | 5.8 | 9.5 |
| sikesi, Florida | DSC00721 UF 248048 | 15.1 | 6.7 | 5.7 | 8.5 |
| sikesi, Florida | DSC00723 UF 248047 | 13   | 6.3 | 5.4 | 7.1 |
| sikesi, Florida | DSC00724 UF 248049 | 13.6 | 6.3 | 5.4 | 7.2 |
| sikesi, Florida | DSC00725 UF 248046 | 10.2 | 4.6 | 3.9 | 5.7 |

---
